# Supplementary material for: Click maltose as an alternative to reverse phase material for desalting glycopeptides
Source: Royal Society of Chemistry journal article supplement (doi:10.1039/c1an15362e), 2011-01-01
Supplement: c1an15362e.pdf [file c1an15362e.pdf]

Supporting figure 1

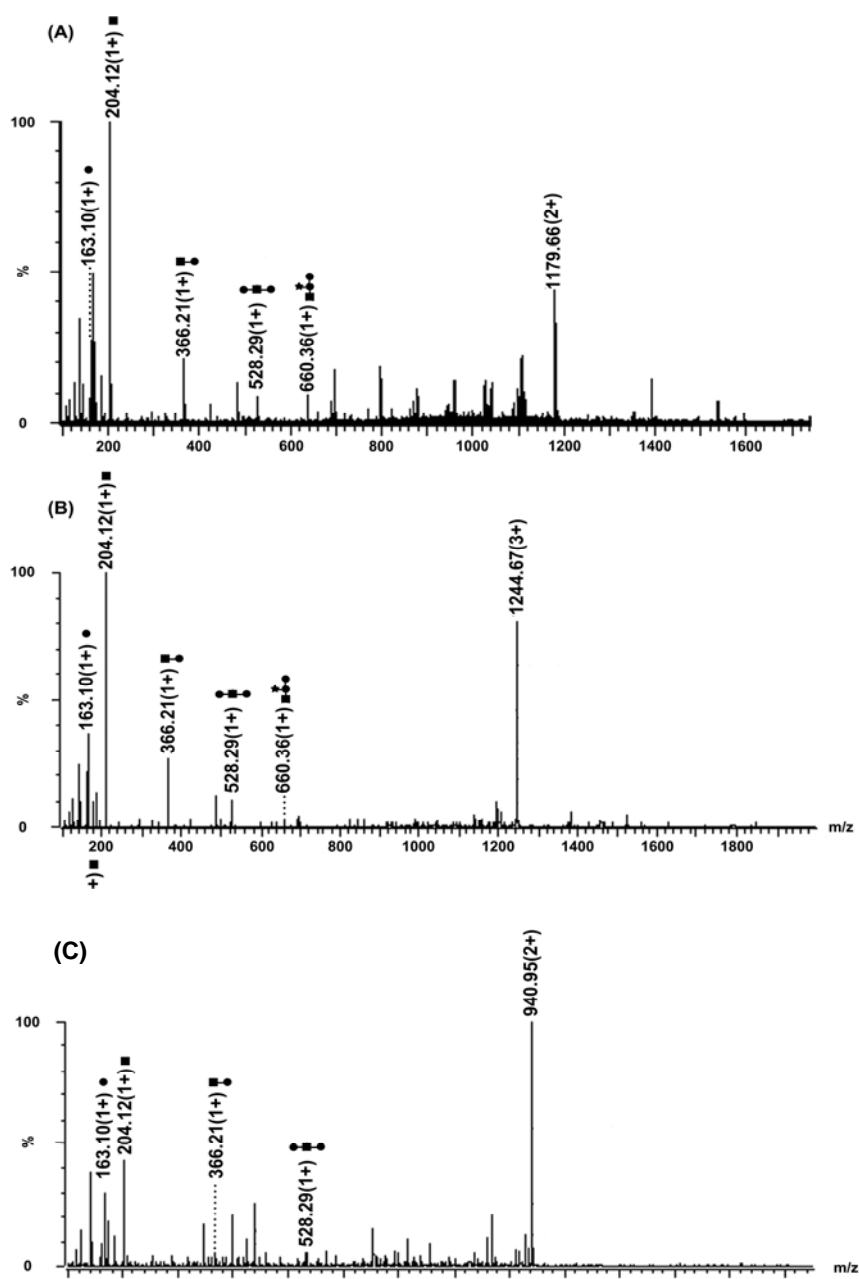

Supporting figure 1. The product ion spectra of confirmed HRP glycopeptides. A) precursor ion at m/z 1179.66 (2+), B) precursor ion at m/z 1244.67 (3+) and C) precursor ion at m/z 940.95 (2+). ● galactose; ★: xylose; ■ N-acetyl-glucosamine.
